# Supplementary material for: The Determinants of Adolescent Glycolipid Metabolism Disorder: A Cohort Study
Source: Int J Endocrinol. 2022 Jun 8;2022:6214785. doi: 10.1155/2022/6214785 (PMC9200567; doi:10.1155/2022/6214785)
Supplement: Supplementary Materials — eTable 1: general characteristics of childhood between participants with follow-up and withdrawal. eTable 2: the risk factors for HbA1c level in adolescents. eTable 3: the logistic regression model of IR and glycolipid metabolism disorder. [file 6214785.f1.zip]

Archive with 3 entries (3 files):
- 6214785.f1/Supplementary_etable_1_(8.2) (1).docx
- 6214785.f1/Supplementary_etable_2_(8.2) (1).docx
- 6214785.f1/Supplementary_etable_3_(8.2) (1).docx
